# Supplementary material for: Enzyme/inorganic nanoparticle dual-loaded animal protein/plant protein composite nanospheres and their synergistic effect in cancer therapy
Source: Royal Society of Chemistry journal article supplement (doi:10.1039/d3tb00402c), 2023-01-01
Supplement: d3tb00402c1.pdf [file d3tb00402c1.pdf]

## Supporting Information

### **Enzyme/inorganic nanoparticle dual-loaded animal protein/plant protein composite nanospheres and their synergistic effect in cancer therapy**

*Qiaolin Chen,<sup>#</sup> Mi Wu,<sup>#</sup> Jinrong Yao, Zhengzhong Shao, Xin Chen\**

State Key Laboratory of Molecular Engineering of Polymers, Department of Macromolecular Science, Shanghai Stomatological Hospital & School of Stomatology, Laboratory of Advanced Materials, Fudan University, Shanghai, 200433, People's Republic of China

\*E-mail: chenx@fudan.edu.cn

<sup>#</sup> Q. C. and M. W. contribute equally to this work.

Number of pages: 3

Number of figure: 2

Number of table: 1

**Table S1.** Size and zeta potential of RSF/zein and GOx@RSF/zein nanospheres

| Sample       | Hydrodynamic<br>Diameter (nm) | PDI               | Zeta Potential<br>(mV) |
|--------------|-------------------------------|-------------------|------------------------|
| RSF/Zein     | $300 \pm 6$                   | $0.032 \pm 0.014$ | $-29.1 \pm 0.6$        |
| GOx@RSF/zein | $304 \pm 3$                   | $0.041 \pm 0.007$ | $-22.1 \pm 0.5$        |

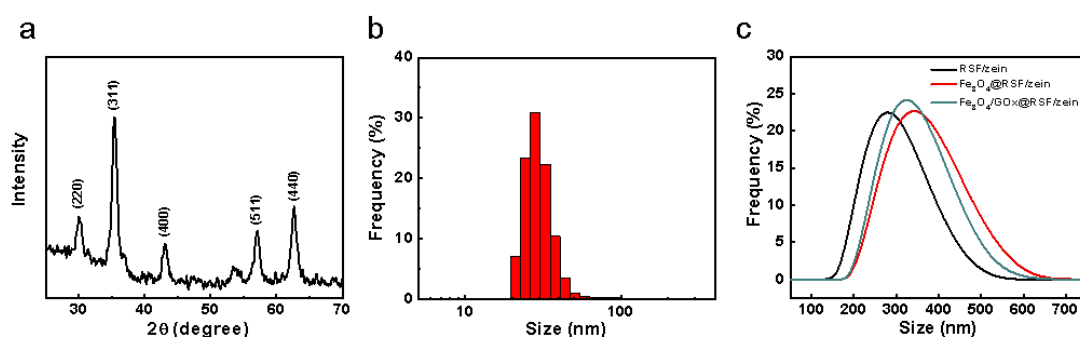**Fig. S1** Characterization of Fe<sub>3</sub>O<sub>4</sub> nanoparticles and the related nanospheres. (a) XRD pattern and (b) hydrodynamic diameter distribution histogram of Fe<sub>3</sub>O<sub>4</sub> nanoparticles synthesized by co-precipitation, (c) hydrodynamic diameter of RSF/zein, Fe<sub>3</sub>O<sub>4</sub>@RSF/zein, and Fe<sub>3</sub>O<sub>4</sub>/GOx@RSF/zein nanospheres.

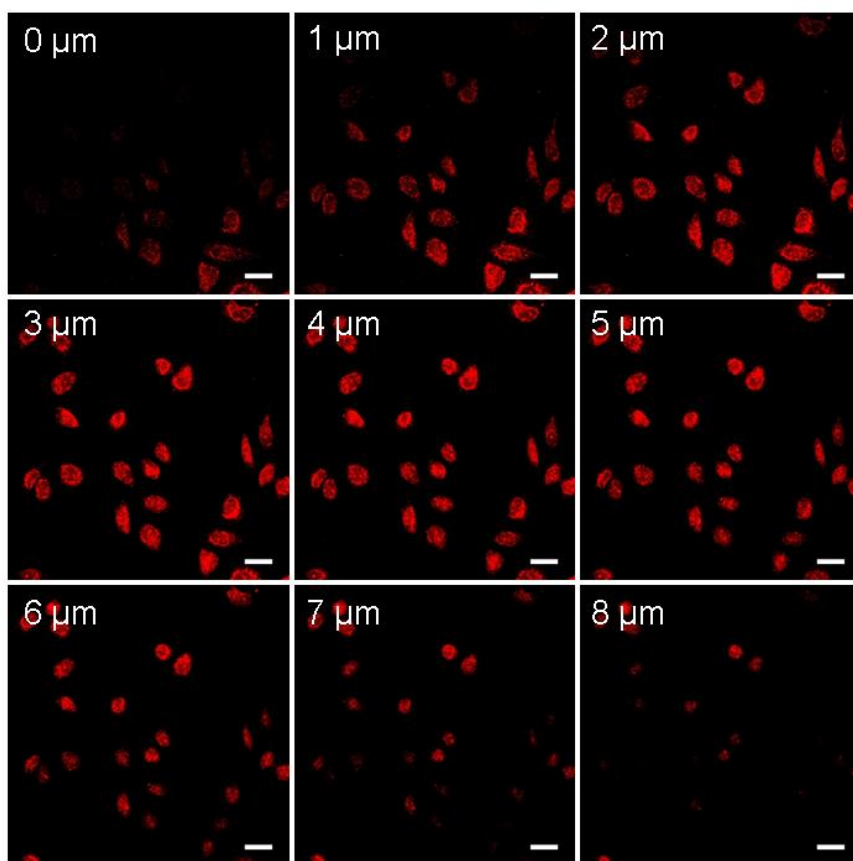

**Fig. S2** Z-stack confocal fluorescence images of MCF-7 cell after incubated with  $\text{Fe}_3\text{O}_4/\text{GOx}@\text{RSF}/\text{zein}$  nanospheres at 37 °C for 4 h. Scanning step: 1  $\mu\text{m}$ . Scale bar: 20  $\mu\text{m}$ .
